# Supplementary material for: Telomere Length and Hearing Loss: A Two-Sample Mendelian Randomization
Source: MDPI journal article supplement (doi:10.3390/ijerph19158937), 2022-07-22
Supplement: s1 [file s1]

**Supplementary Table S2. The genetic instruments for Mendelian randomization analysis of leukocyte telomere length (exposure) and HL (outcome).**

| SNP        | effect_allele | other_allele | Association with telomere length |       |          | Association with HL |       |       |
|------------|---------------|--------------|----------------------------------|-------|----------|---------------------|-------|-------|
|            |               |              | beta                             | se    | pval     | beta                | se    | pval  |
| rs2302588  | C             | G            | 0.048                            | 0.008 | 2.00E-08 | -0.011              | 0.038 | 0.774 |
| rs2736176  | C             | G            | 0.034                            | 0.005 | 3.00E-10 | 0.011               | 0.021 | 0.608 |
| rs3219104  | C             | A            | 0.042                            | 0.006 | 9.00E-11 | 0.068               | 0.094 | 0.470 |
| rs4691895  | C             | G            | 0.058                            | 0.006 | 1.00E-21 | 0.027               | 0.024 | 0.269 |
| rs59294613 | A             | C            | -0.041                           | 0.005 | 1.00E-13 | -0.009              | 0.023 | 0.675 |
| rs62053580 | G             | A            | -0.039                           | 0.007 | 4.00E-08 | 0.031               | 0.030 | 0.299 |
| rs9419958  | C             | T            | -0.064                           | 0.007 | 5.00E-19 | -0.018              | 0.029 | 0.533 |

Notes: beta: effect size estimates; se: standard error; HL: hearing loss
