# Supplementary material for: Telomere Length and Hearing Loss: A Two-Sample Mendelian Randomization
Source: MDPI journal article supplement (doi:10.3390/ijerph19158937), 2022-07-22
Supplement: s1 [file s1]

**Supplementary Table S3. The genetic instruments for Mendelian randomization analysis of leukocyte telomere length (exposure) and ARHL(outcome).**

| SNP        | effect_allele | other_allele | Association with telomere length |       |          | Association with ARHL |       |       |
|------------|---------------|--------------|----------------------------------|-------|----------|-----------------------|-------|-------|
|            |               |              | beta                             | se    | p        | beta                  | se    | p     |
| rs2302588  | C             | G            | 0.048                            | 0.008 | 2.00E-08 | 0.083                 | 0.127 | 0.511 |
| rs2736176  | C             | G            | 0.034                            | 0.005 | 3.00E-10 | -0.117                | 0.068 | 0.084 |
| rs3219104  | C             | A            | 0.042                            | 0.006 | 9.00E-11 | -0.064                | 0.286 | 0.823 |
| rs4691895  | C             | G            | 0.058                            | 0.006 | 1.00E-21 | 0.002                 | 0.078 | 0.976 |
| rs59294613 | A             | C            | -0.041                           | 0.005 | 1.00E-13 | -0.084                | 0.073 | 0.252 |
| rs62053580 | G             | A            | -0.039                           | 0.007 | 4.00E-08 | -0.041                | 0.095 | 0.668 |
| rs9419958  | C             | T            | -0.064                           | 0.007 | 5.00E-19 | 0.051                 | 0.098 | 0.599 |

Notes: beta: effect size estimates; se: standard error; ARHL: age-related hearing loss
