# Supplementary material for: Telomere Length and Hearing Loss: A Two-Sample Mendelian Randomization
Source: MDPI journal article supplement (doi:10.3390/ijerph19158937), 2022-07-22
Supplement: s1 [file s1]

**Table S1. SNPs used for the LTL instruments in the Mendelian Randomisation analyses.**

| SNPID       | effect_allele | other_allele | effect_allele_freq | beta   | se    | P-value  |
|-------------|---------------|--------------|--------------------|--------|-------|----------|
| rs10936600  | T             | A            | 0.243              | -0.086 | 0.006 | 6.00E-51 |
| rs7705526   | A             | C            | 0.328              | 0.082  | 0.006 | 5.00E-45 |
| rs2853677   | A             | G            | 0.592              | -0.064 | 0.005 | 3.00E-31 |
| rs4691895   | C             | G            | 0.783              | 0.058  | 0.006 | 1.00E-21 |
| rs9419958   | C             | T            | 0.862              | -0.064 | 0.007 | 5.00E-19 |
| rs75691080  | T             | C            | 0.091              | -0.067 | 0.009 | 6.00E-14 |
| rs59294613  | A             | C            | 0.293              | -0.041 | 0.005 | 1.00E-13 |
| rs8105767   | G             | A            | 0.289              | 0.039  | 0.005 | 5.00E-13 |
| rs73624724  | C             | T            | 0.129              | 0.051  | 0.007 | 6.00E-12 |
| rs3219104   | C             | A            | 0.830              | 0.042  | 0.006 | 9.00E-11 |
| rs932827    | T             | C            | 0.238              | -0.037 | 0.006 | 3.00E-10 |
| rs2736176   | C             | G            | 0.313              | 0.034  | 0.005 | 3.00E-10 |
| rs3785074   | G             | A            | 0.263              | 0.035  | 0.006 | 4.00E-10 |
| rs7194734   | T             | C            | 0.782              | -0.037 | 0.006 | 7.00E-10 |
| rs34978822  | G             | C            | 0.015              | -0.140 | 0.023 | 7.00E-10 |
| rs34991172  | G             | T            | 0.068              | -0.061 | 0.010 | 6.00E-09 |
| rs228595    | A             | G            | 0.417              | -0.028 | 0.005 | 1.00E-08 |
| rs2302588   | C             | G            | 0.100              | 0.048  | 0.008 | 2.00E-08 |
| rs13137667  | C             | T            | 0.959              | 0.077  | 0.014 | 2.00E-08 |
| rs55749605  | A             | C            | 0.579              | -0.037 | 0.007 | 2.00E-08 |
| rs62053580  | G             | A            | 0.169              | -0.039 | 0.007 | 4.00E-08 |
| rs754017156 | NA            | GGGCCCG      | 0.165              | 0.047  | 0.009 | 8.00E-08 |
| rs12909131  | T             | C            | 0.231              | -0.031 | 0.006 | 1.00E-07 |
| rs1744757   | T             | C            | 0.851              | 0.036  | 0.007 | 1.00E-07 |
| rs2124616   | A             | G            | 0.140              | -0.037 | 0.007 | 2.00E-07 |
| rs2613954   | T             | C            | 0.886              | -0.038 | 0.008 | 1.00E-06 |
| rs12065882  | G             | A            | 0.208              | 0.030  | 0.006 | 1.00E-06 |
| rs2386642   | A             | G            | 0.673              | -0.026 | 0.005 | 1.00E-06 |
| rs56810761  | T             | C            | 0.270              | 0.027  | 0.006 | 1.00E-06 |
| rs62365174  | G             | A            | 0.088              | -0.054 | 0.011 | 1.00E-06 |
| rs112655343 | T             | C            | 0.102              | 0.043  | 0.009 | 2.00E-06 |
| rs55710439  | T             | C            | 0.014              | 0.105  | 0.022 | 3.00E-06 |
| rs11640926  | G             | T            | 0.139              | 0.056  | 0.012 | 3.00E-06 |
| rs60160057  | A             | G            | 0.211              | -0.029 | 0.006 | 3.00E-06 |
| rs117536281 | G             | A            | 0.034              | 0.085  | 0.018 | 3.00E-06 |
| rs7510583   | G             | A            | 0.290              | 0.035  | 0.007 | 3.00E-06 |
| rs59192843  | G             | T            | 0.059              | 0.065  | 0.014 | 4.00E-06 |
| rs57415150  | A             | G            | 0.042              | -0.058 | 0.013 | 4.00E-06 |
| rs6038821   | T             | A            | 0.038              | 0.060  | 0.013 | 4.00E-06 |
| rs144204502 | T             | C            | 0.014              | -0.090 | 0.020 | 5.00E-06 |
| rs6107615   | C             | T            | 0.422              | -0.023 | 0.005 | 6.00E-06 |
| rs9972513   | T             | C            | 0.281              | 0.025  | 0.005 | 6.00E-06 |

|             |    |      |       |        |       |          |
|-------------|----|------|-------|--------|-------|----------|
| rs117037102 | T  | C    | 0.018 | 0.098  | 0.022 | 7.00E-06 |
| rs7276273   | C  | A    | 0.007 | -0.150 | 0.033 | 7.00E-06 |
| rs11665818  | A  | G    | 0.195 | 0.028  | 0.006 | 7.00E-06 |
| rs3213718   | T  | C    | 0.583 | 0.022  | 0.005 | 7.00E-06 |
| rs112347796 | AG | AGAG | 0.049 | 0.069  | 0.015 | 7.00E-06 |
| rs143276018 | C  | T    | 0.018 | -0.102 | 0.023 | 9.00E-06 |
| rs201375979 | -  | TA   | 0.317 | 0.033  | 0.007 | 9.00E-06 |
| rs7311314   | A  | G    | 0.317 | 0.024  | 0.005 | 9.00E-06 |
| rs35675808  | G  | C    | 0.028 | 0.074  | 0.017 | 1.00E-05 |
| rs117610974 | G  | C    | 0.009 | -0.154 | 0.035 | 1.00E-05 |

---
