# Supplementary material for: Telomere Length and Hearing Loss: A Two-Sample Mendelian Randomization
Source: MDPI journal article supplement (doi:10.3390/ijerph19158937), 2022-07-22
Supplement: s1 [file s1]

**Supplementary Table S4. The genetic instruments for Mendelian randomization analysis of leukocyte telomere length (exposure) and NIHL (outcome).**

| SNP        | effect_allele | other_allele | Association with telomere length |       |          | Association with NIHL |       |       |
|------------|---------------|--------------|----------------------------------|-------|----------|-----------------------|-------|-------|
|            |               |              | beta                             | se    | pval     | beta                  | se    | pval  |
| rs10936600 | T             | A            | -0.086                           | 0.006 | 6.00E-51 | 0.000                 | 0.001 | 0.690 |
| rs13137667 | C             | T            | 0.077                            | 0.014 | 2.00E-08 | 0.001                 | 0.003 | 0.730 |
| rs228595   | A             | G            | -0.028                           | 0.005 | 1.00E-08 | -0.001                | 0.001 | 0.540 |
| rs2302588  | C             | G            | 0.048                            | 0.008 | 2.00E-08 | -0.004                | 0.002 | 0.013 |
| rs2736176  | C             | G            | 0.034                            | 0.005 | 3.00E-10 | 0.005                 | 0.001 | 0.000 |
| rs3219104  | C             | A            | 0.042                            | 0.006 | 9.00E-11 | 0.003                 | 0.001 | 0.053 |
| rs3219104  | C             | A            | 0.042                            | 0.006 | 9.00E-11 | 0.003                 | 0.005 | 0.530 |
| rs3785074  | G             | A            | 0.035                            | 0.006 | 4.00E-10 | 0.000                 | 0.001 | 0.800 |
| rs4691895  | C             | G            | 0.058                            | 0.006 | 1.00E-21 | 0.000                 | 0.001 | 0.750 |
| rs59294613 | A             | C            | -0.041                           | 0.005 | 1.00E-13 | 0.000                 | 0.001 | 0.790 |
| rs62053580 | G             | A            | -0.039                           | 0.007 | 4.00E-08 | 0.002                 | 0.001 | 0.160 |
| rs7194734  | T             | C            | -0.037                           | 0.006 | 7.00E-10 | 0.000                 | 0.001 | 0.920 |
| rs75691080 | T             | C            | -0.067                           | 0.009 | 6.00E-14 | 0.001                 | 0.002 | 0.420 |
| rs7705526  | A             | C            | 0.082                            | 0.006 | 5.00E-45 | 0.001                 | 0.001 | 0.360 |
| rs8105767  | G             | A            | 0.039                            | 0.005 | 5.00E-13 | -0.002                | 0.001 | 0.029 |
| rs9419958  | C             | T            | -0.064                           | 0.007 | 5.00E-19 | 0.000                 | 0.001 | 0.770 |

Notes: beta: effect size estimates; se: standard error; NIHL: noise-induced hearing loss
